# Supplementary material for: Efficacy and safety of wait and see strategy versus radical surgery and local excision for rectal cancer with cCR response after neoadjuvant chemoradiotherapy: a meta-analysis
Source: Springer Nature journal article supplement (doi:10.1186/s12957-020-02003-6), 2020-08-31
Supplement: 12957_2020_2003_MOESM7_ESM.pdf [file 12957_2020_2003_MOESM7_ESM.pdf]

This document certifies that the manuscript

## **Efficacy and safety of wait and see strategy versus radical surgery and local excision for rectal cancer with cCR response after neoadjuvant chemoradiotherapy: a meta-analysis**

prepared by the authors

**Guo-hua Zhao, Li Deng, Dong-man Ye, Wen-hui Wang, Yan Yan and Tao Yu**

was edited for proper English language, grammar, punctuation, spelling, and overall style by one or more of the highly qualified native English speaking editors at AJE.

This certificate was issued on **June 23, 2020** and may be verified on the [AJE website](#) using the verification code **98EB-08BE-5F61-6F17-406A**.

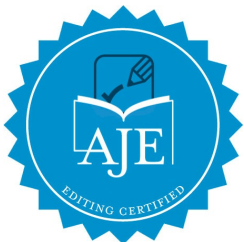

Neither the research content nor the authors' intentions were altered in any way during the editing process. Documents receiving this certification should be English-ready for publication; however, the author has the ability to accept or reject our suggestions and changes. To verify the final AJE edited version, please visit our verification page at [aje.com/certificate](http://aje.com/certificate). If you have any questions or concerns about this edited document, please contact AJE at [support@aje.com](mailto:support@aje.com).
